# Supplementary material
Source: publisher figshare collection journal article supplement (https://tandf.figshare.com/ndownloader/files/17177513)
Supplement: Supplementary file 1 [file 17177513]

Supplemental table 1. Parameters for analysis of leaf indole-3-acetic acid (IAA), C13-labeled IAA, and abscisic acid (ABA), trans-zeatin riboside (t-ZR), isopentenyl adenosine (iPA), and gibberellin A4 (GA4) using liquid chromatography-mass spectrometry/mass spectrometry (LC-MS/MS).

| Analyte | Retention time (min) | Precursor ion | Product  ion | Application | Collision energy | Mode |
| --- | --- | --- | --- | --- | --- | --- |
| IAA | 3.9 | 176.1 | 130.2 | Quantitative | 12 | + |
|  |  |  | 77.2 | Qualitative | 52 | + |
| C13-IAA | 3.9 | 182.1 | 136.2 | Quantitative | 12 | + |
|  |  |  | 83.2 | Qualitative | 52 | + |
| ABA | 4.6 | 265.2 | 229.2 | Quantitative | 0 | + |
|  |  |  | 91.2 | Qualitative | 4 | + |
| ZR | 2.3 | 352.2 | 220.0 | Quantitative | 16 | + |
|  |  |  | 136.2 | Qualitative | 32 | + |
| iPA | 4.3 | 336.0 | 204.0 | Quantitative | 20 | + |
|  |  |  | 136.0 | Qualitative | 30 | + |
| GA4 | 6.0 | 331.3 | 213.2 | Quantitative | 35 | - |
|  |  |  | 269.1 | Qualitative | 20 | - |
